# Supplementary material for: A pH-controlled one-pot synthesis of gold nanostars by using a zwitterionic protein hydrolysate (gelatin): an enhanced radiosensitization of cancer cells
Source: Royal Society of Chemistry journal article supplement (doi:10.1039/d1nj01903a), 2021-01-01
Supplement: d1nj01903a1.pdf [file d1nj01903a1.pdf]

## **pH controlled one pot synthesis of gold nanostars by using zwitterionic protein hydrolysate (gelatin): Enhanced radio-sensitization of cancer cells**

**Ram Pada Das<sup>1,2</sup>, Vishwa V. Gandhi<sup>1,2</sup>, Beena G. Singh<sup>1,2,\*</sup>, Amit Kunwar<sup>1,2\*</sup>**

<sup>1</sup>Radiation & Photochemistry Division, Bhabha Atomic Research Centre, Trombay, Mumbai-400085, India

<sup>2</sup>HomiBhabha National Institute, Anushaktinagar, Mumbai –400094, India

E-mail : <beenam@barc.gov.in; kamit@barc.gov.in>

### **Supplementary method:**

The storage stability of different shapes of gold nanoparticles (An NPs) was evaluated by monitoring their SPR spectrum and hydrodynamic size by DLS at different time intervals ranging from one to six months. The samples were stored in refrigerator at 4 °C for six months. Similarly, the stability of the An NPs was studied in presence of PBS and 10 % fetal bovine serum (FBS). In brief, first the DLS of the solvent containing 10% FBS was checked and the hydrodynamic size of the protein was measured. PBS solution did not show any scattering intensity. After that 0.5 ml of Au-NPs was mixed, separately with 2.5 ml PBS (1X)/10% FBS solution and the sample was allowed to incubate for 2 hrs. This was followed by estimation of hydrodynamic size by DLS.

## Supplementary Figures

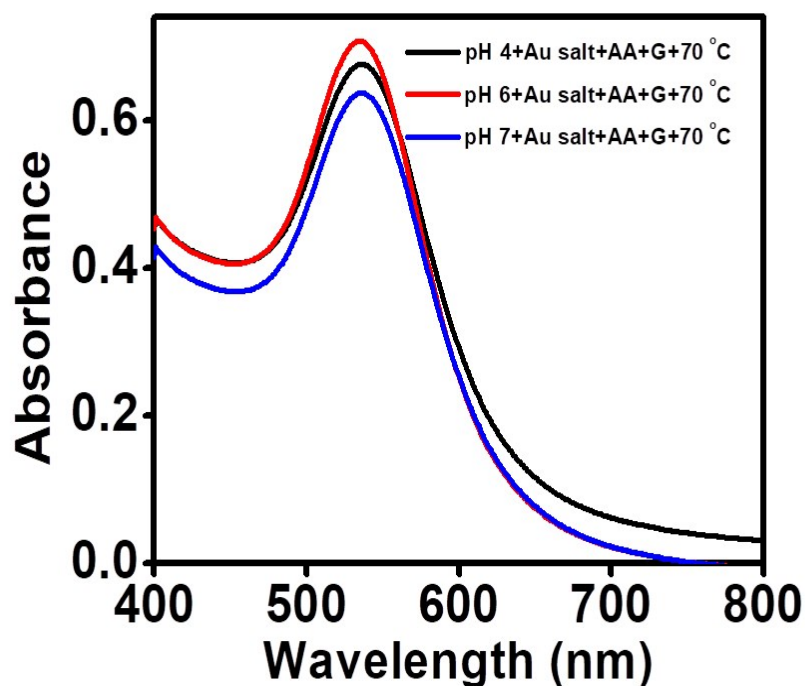

**SFig. 1** Plots represent absorption spectra of gold nanoparticles formed by heating aqueous solution of 3 mM  $\text{KAuCl}_4$ , 10 mM ascorbic acid (AA), 0.5% gelatin at 70 °C and varying pHs 4, 6 and 9.

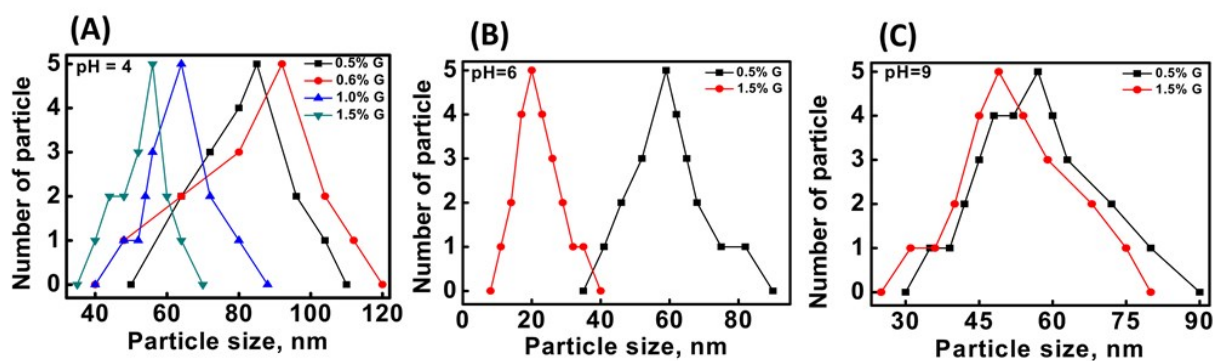

**SFig. 2** Plots represent the size distribution as observed in the TEM images of the Au-NPs formed at pH 4 (A), pH 6 (B) and pH 9 (C).

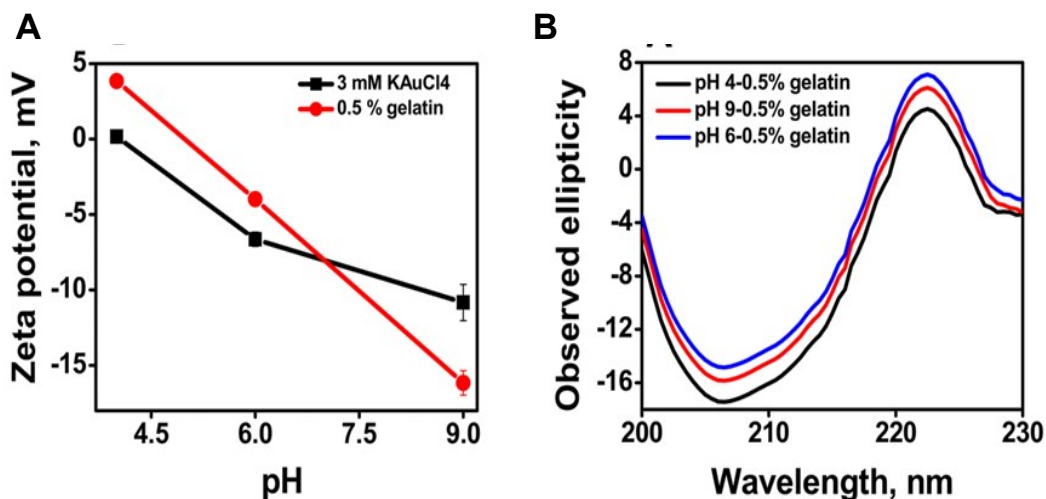

**SFig. 3** Plot A corresponds to variation in zeta potential value of gold salt and 0.5% gelatin as a function of pH 4, 6 and 9. Plot B represents circular dichroism spectra of gelatin at pH 4, 6 and 9.

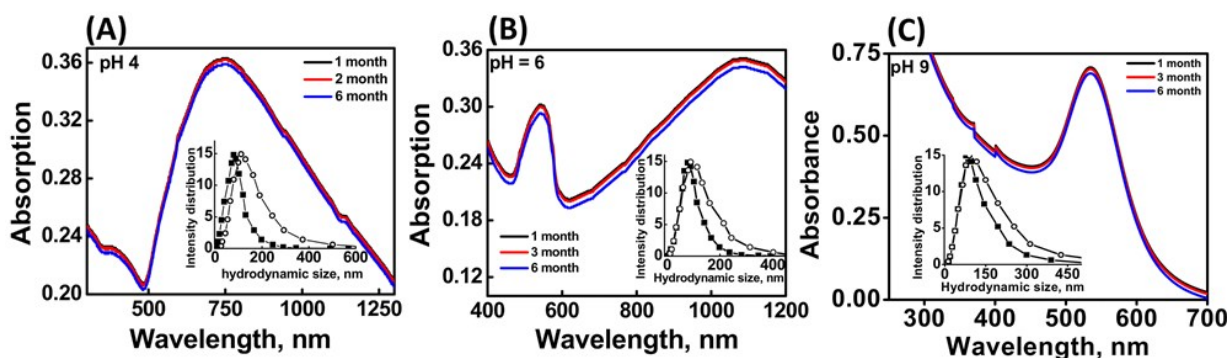

**SFig. 4** Figure depicting stability of different shapes of Au- nanoparticles formed in presence of 0.5 % gelatin at different pHs. The main figure shows the SPR spectrum of the nanoparticles formed at pH 4 (A), pH 6 (B) and pH 9 (C). Inset of each plot shows the size distribution obtained after one month (●) and sixth month (○).

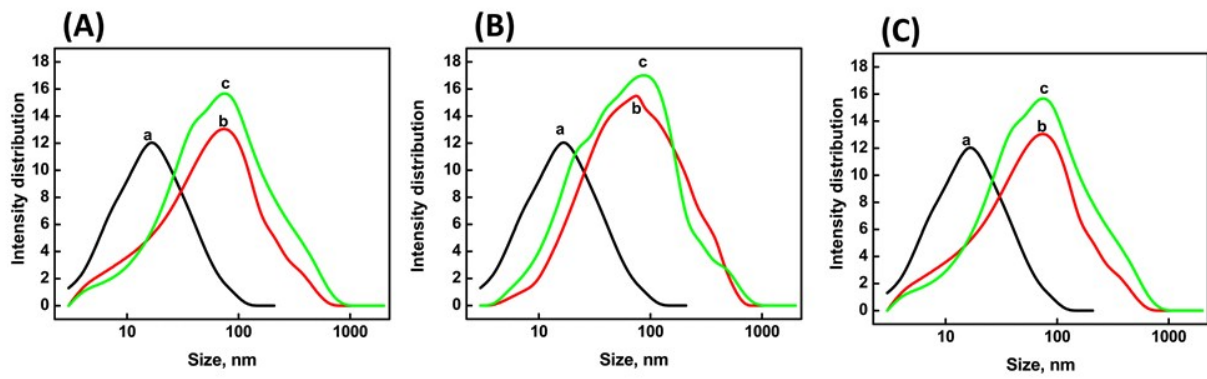

**SFig. 5** Figure depicting stability of Au- nanoparticles formed in presence of 10 % FBS. The graph shows the intensity distribution of Au nanoparticles formed at pH 4 (A), pH 6 (B) and pH 9 (C). The line (a) corresponds to the scattering due to 10% FBS, while line (b) and (c) corresponds to the scattering due to Au nanoparticles in absence and presence of 10 % FBS, respectively.

## Supplementary Tables

**Table S1** Effects of gelatin concentration, pH of reaction mixture and ascorbic acid (AA) on the morphology of gold nanoparticles.

| Gelatin Concentration | pH of reaction mixture | Ascorbic acid (AA) 10 mM | Morphology of nanoparticles | SPR (nm)  |
|-----------------------|------------------------|--------------------------|-----------------------------|-----------|
| 0.5%                  | 4                      | Present                  | Star                        | 760       |
|                       |                        | Absent                   | Not formed                  | -         |
|                       | 6                      | Present                  | Spherical                   | 530       |
|                       |                        | Absent                   | Triangular                  | 530, 1086 |
|                       | 9                      | Present                  | Spherical                   | 530       |
|                       |                        | Absent                   | Spherical                   | 530       |
| 1.5%                  | 4                      | Present                  | Spherical                   | 620       |
|                       |                        | Absent                   | Not formed                  | -         |
|                       | 6                      | Present                  | Spherical                   | 530       |
|                       |                        | Absent                   | Spherical                   | 530       |
|                       | 9                      | Present                  | Spherical                   | 530       |
|                       |                        | Absent                   | Spherical                   | 530       |

**Table S2** Morphological characterization of star shape gold nanoparticle at different gelatin concentration.

| Gelatin concentration | Ferret radius (nm) | Core size (nm) | Branch length (nm) | Radius of curvature (nm) |
|-----------------------|--------------------|----------------|--------------------|--------------------------|
| 0.5%                  | 85.4±3             | 50.4±5.3       | 8.9±0.8            | 5.2±1.0                  |
| 0.6%                  | 92.4±4.5           | 55.8±6.6       | 8.3±1.1            | 5.0±0.7                  |
| 1%                    | 62.8±2.5           | 43.5±5.7       | 4.3±0.3            | 4.1±0.6                  |
| 1.5%                  | 54.7±3.1           | 52.2±8.1       | 1.1±0.1            | -                        |

**Table S3.** Intensity average, volume average and number average of different shapes of Au-nanoparticles formed.

| Shape of gold nanoparticle | Intensity average | Volume Average | Number average |
|----------------------------|-------------------|----------------|----------------|
| Star                       | 106.0 ± 47.4      | 49.7±21.5      | 20.8±8.2       |
| Triangle                   | 71.0±30.9         | 37.5±12.7      | 14.1±5.8       |
| Spherical                  | 76.5±27.4         | 31.3±18.2      | 18.5±10.4      |
